# Supplementary material
Source: PubMed Central journal article supplement (PMC1253554)

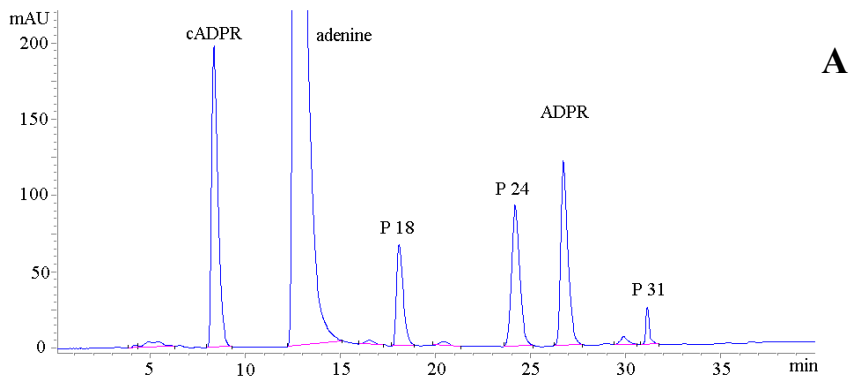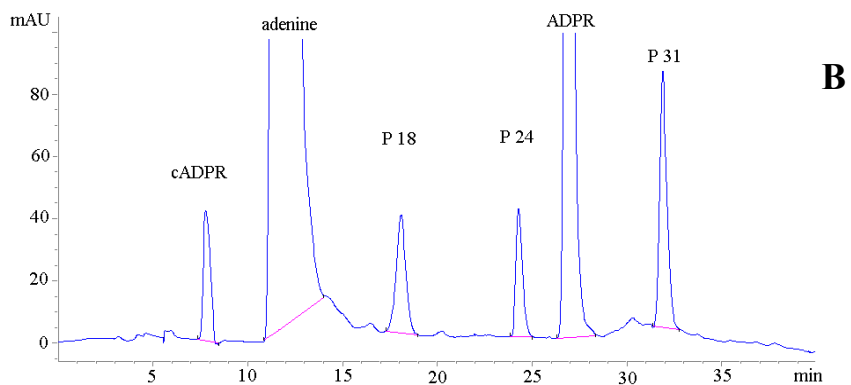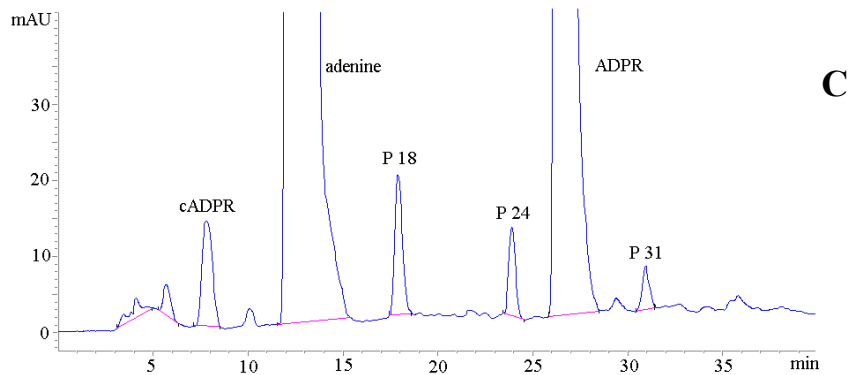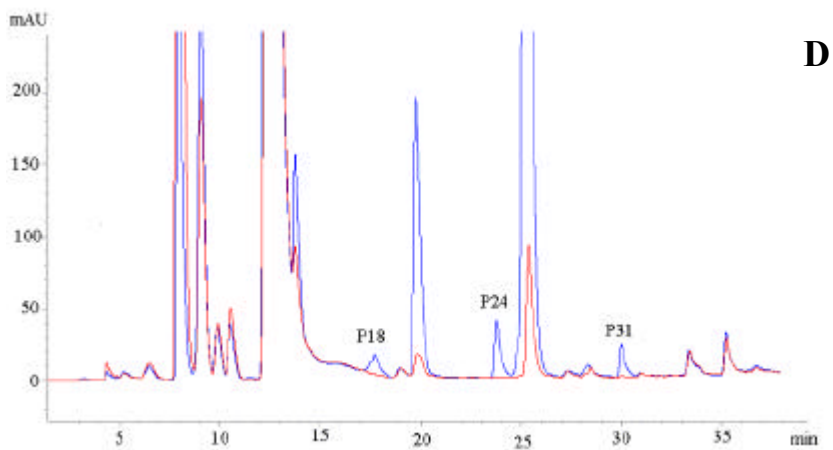

Supplement: pnas_0503691102_1.pdf [file pnas_0503691102_1.pdf]

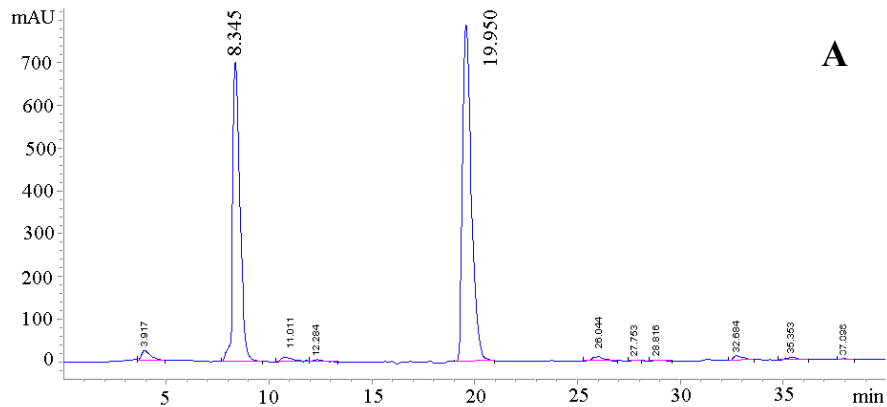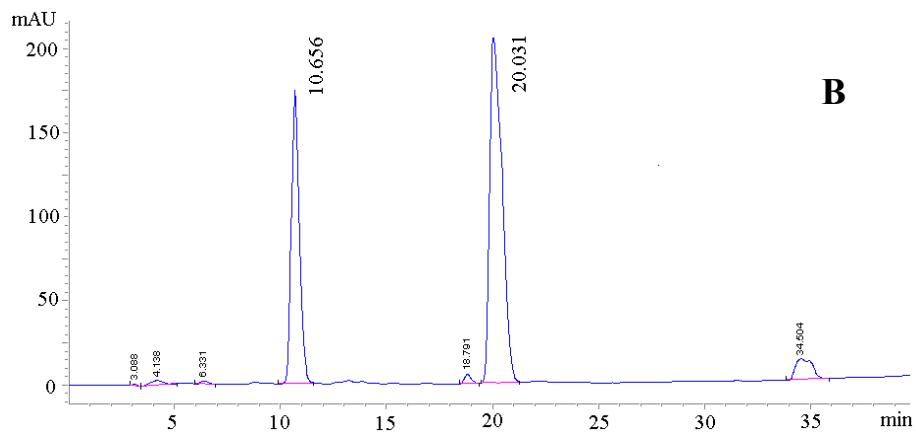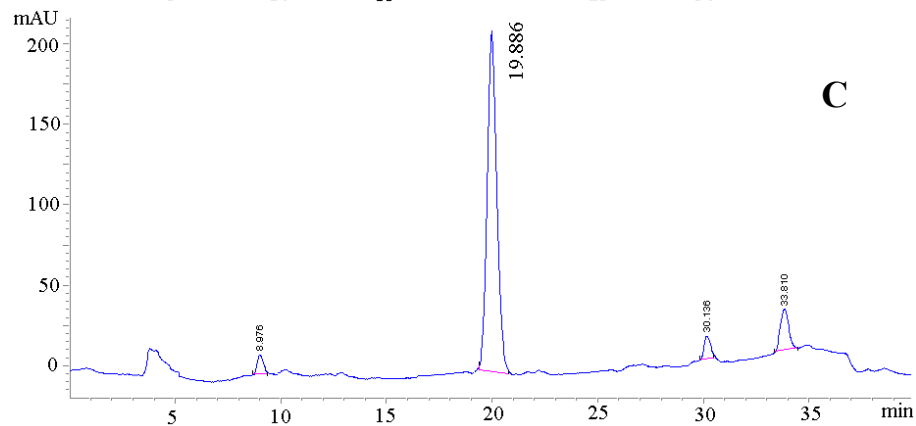

Supplement: pnas_0503691102_2.pdf [file pnas_0503691102_2.pdf]

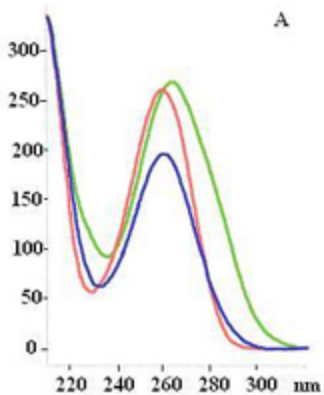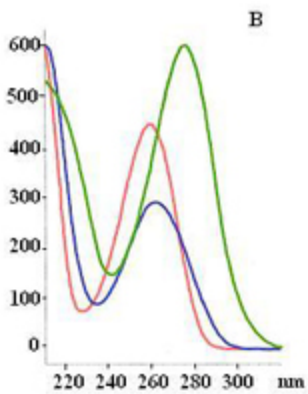

Supplement: pnas_0503691102_3.pdf [file pnas_0503691102_3.pdf]

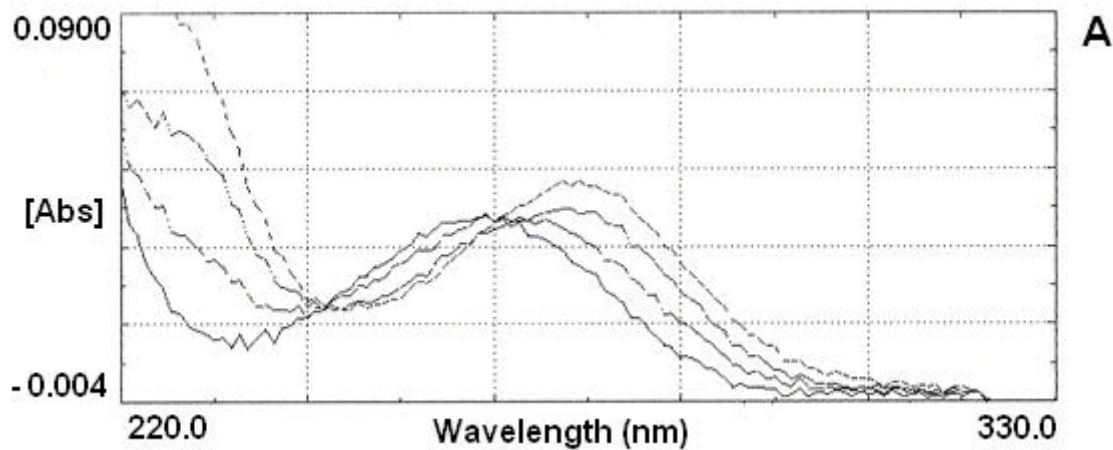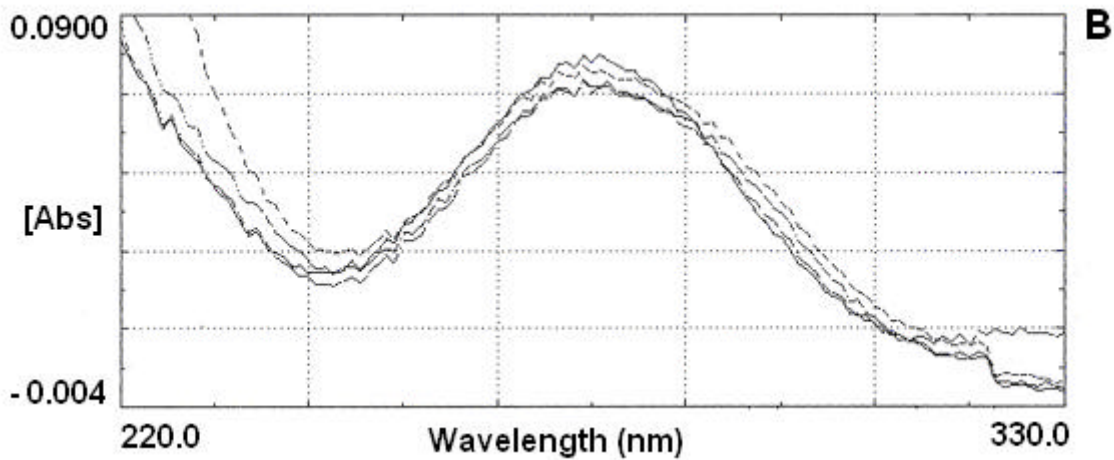

Supplement: pnas_0503691102_4.pdf [file pnas_0503691102_4.pdf]

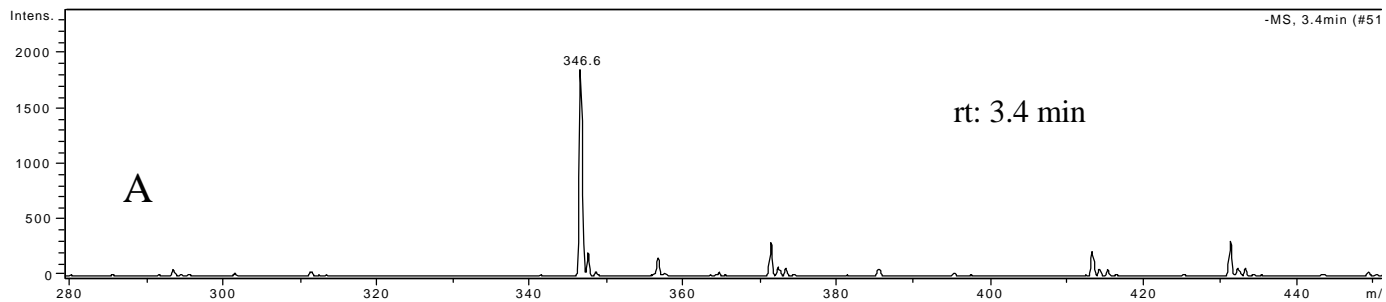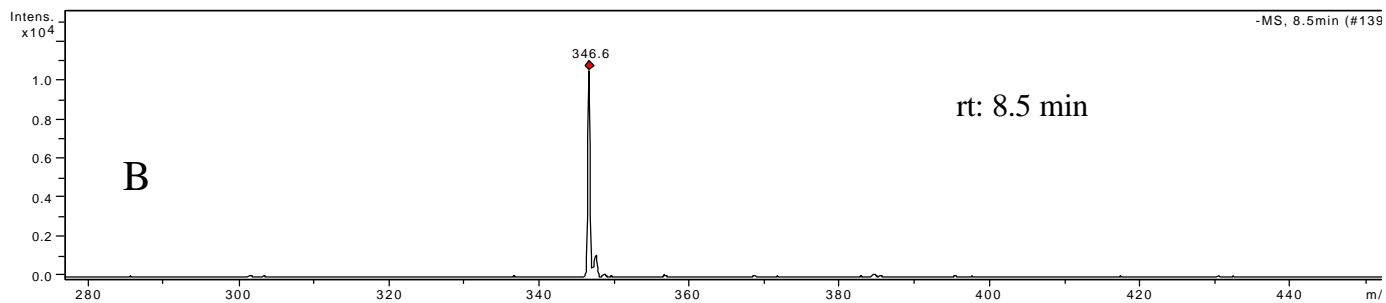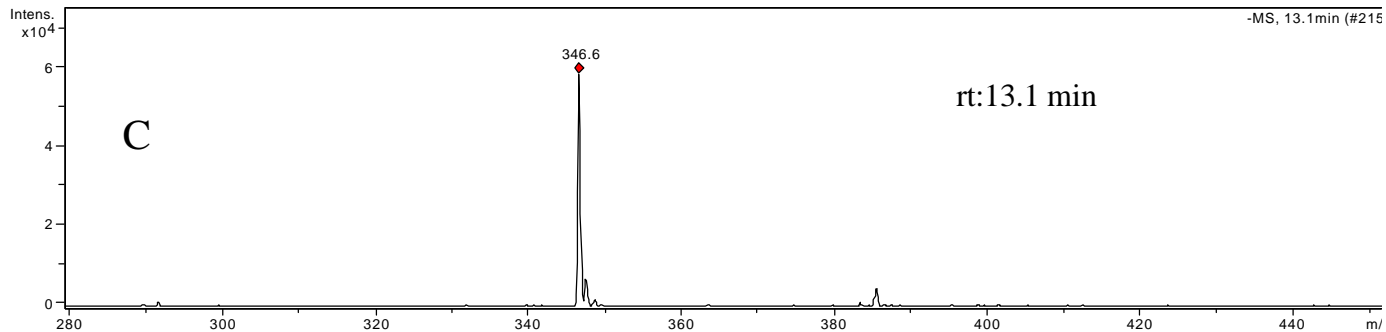

Supplement: pnas_0503691102_5.pdf [file pnas_0503691102_5.pdf]

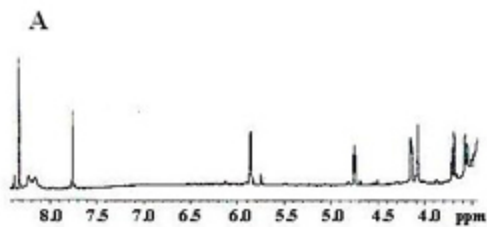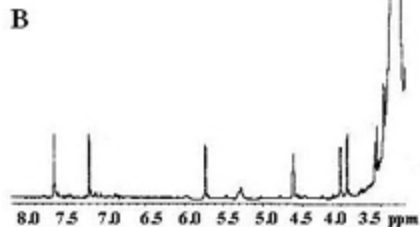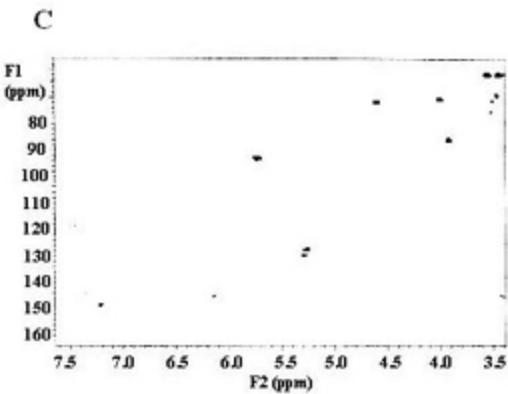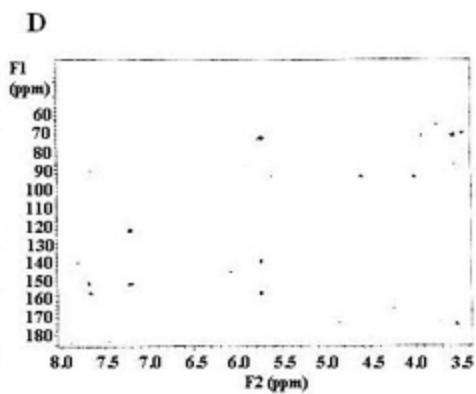

Supplement: pnas_0503691102_6.pdf [file pnas_0503691102_6.pdf]

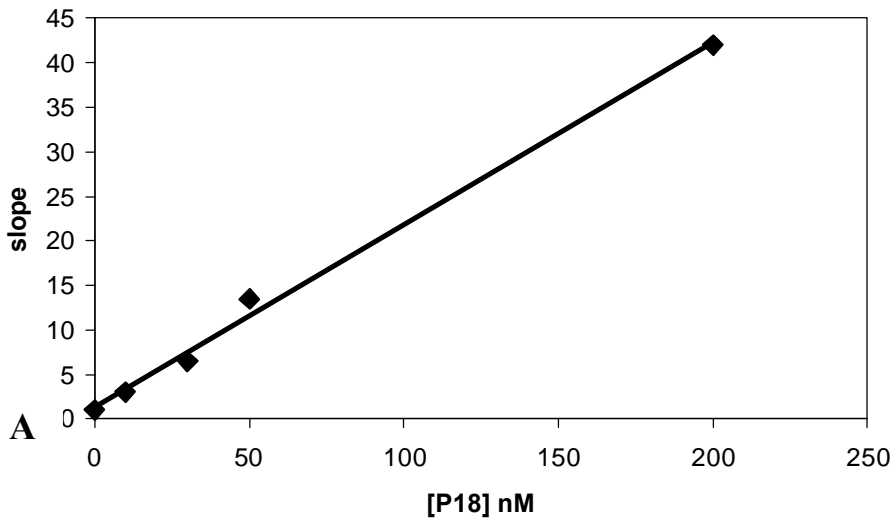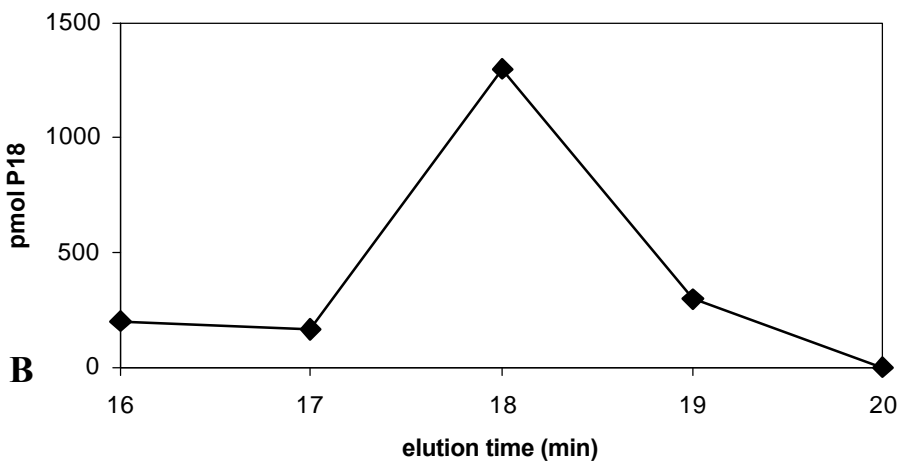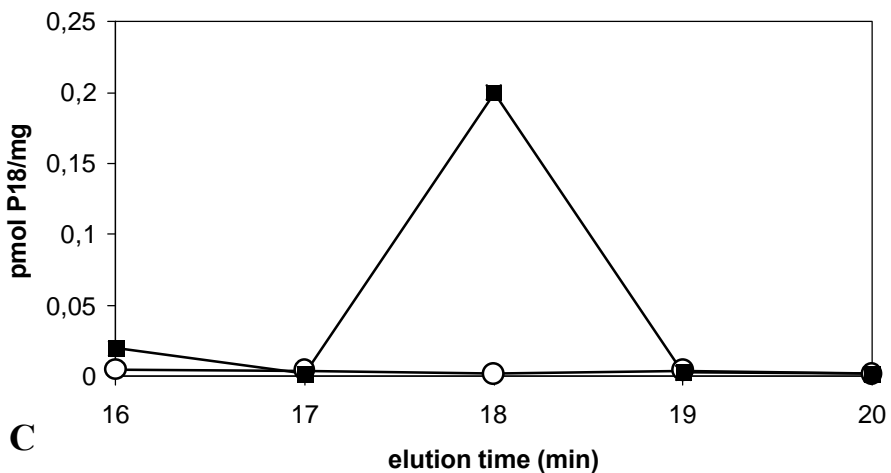

Supplement: pnas_0503691102_7.pdf [file pnas_0503691102_7.pdf]

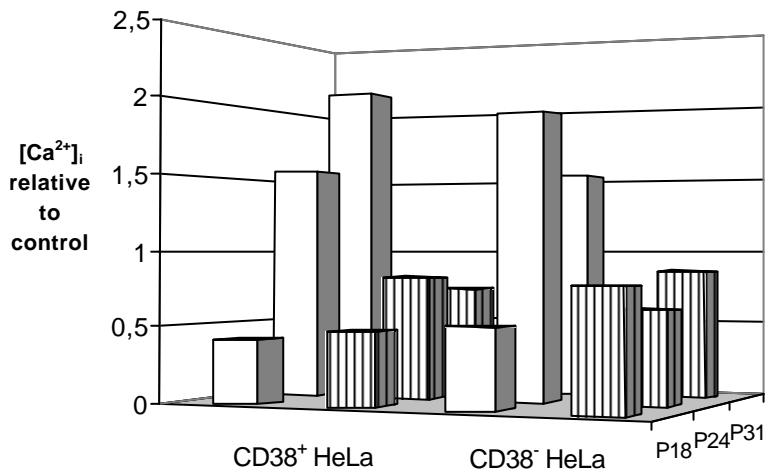

Supplement: pnas_0503691102_8.pdf [file pnas_0503691102_8.pdf]

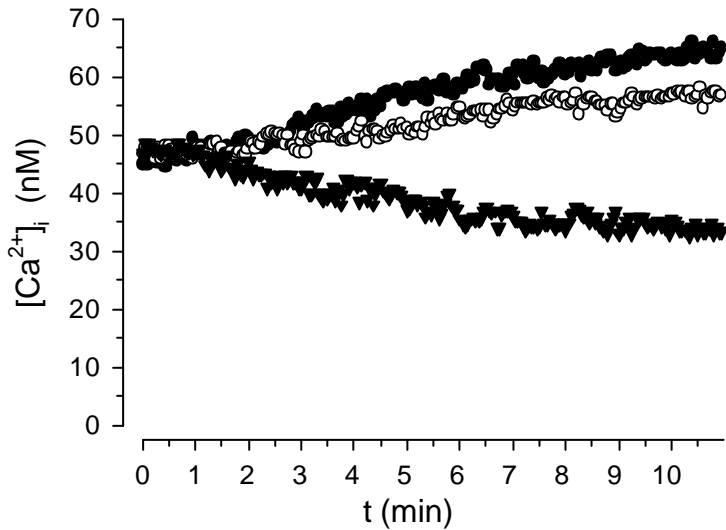

Supplement: pnas_0503691102_9.pdf [file pnas_0503691102_9.pdf]
